# Supplementary material for: Cannabidiol Protects Dopaminergic Neuronal Cells from Cadmium
Source: MDPI journal article supplement (doi:10.3390/ijerph16224420), 2019-11-12
Supplement: s1 [file s1]

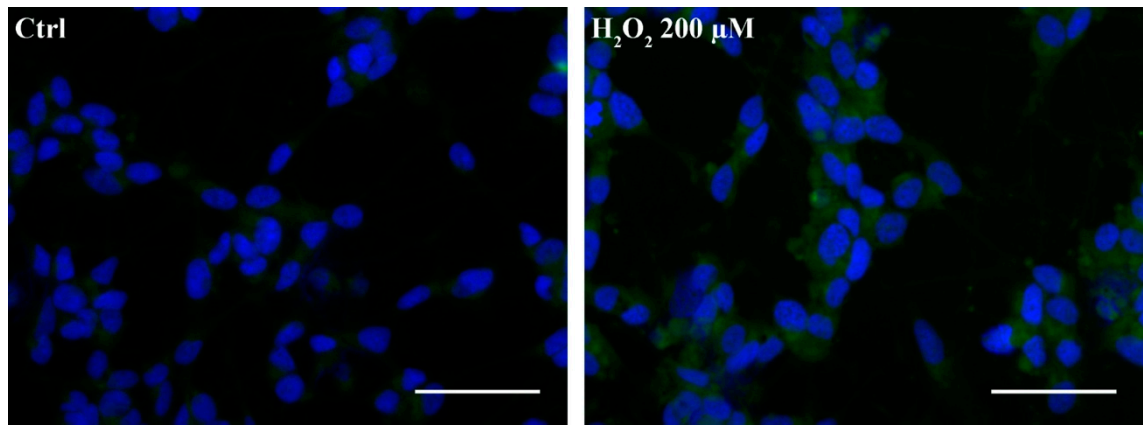

**Figure S1.** Immunofluorescence staining of ROS positive control. ROS expression was quantified by the 2',7'-dichlorodihydrofluorescein diacetate (CM-H<sub>2</sub>DCFDA) probe. The representative fluorescent images show the increase of ROS production induced by H<sub>2</sub>O<sub>2</sub> 200 μM exposure after 24 h. Total magnification: 400×. Scale bar: 50 μm.
